# Supplementary material
Source: ML conference proceedings conference paper supplement (https://proceedings.mlr.press/v32/rodrigues14.html)
Supplement: Supplementary file 1 [file rodrigues14-supp.pdf]

# Supplementary material for: Gaussian Process Classification and Active Learning with Multiple Annotators

Filipe Rodrigues (fmpr@dei.uc.pt)  
Francisco C. Pereira (camara@smart.mit.edu)  
Bernardete Ribeiro (bribeiro@dei.uc.pt)

In this extra material, we provide more details on deriving the moments of the product of the cavity distribution with the exact likelihood term  $\sum_{z_i \in \{0,1\}} p(\mathbf{y}_i|z_i)p(z_i|f_i)$ , which constitutes the step 2 of EP referred in the paper. This derivation was omitted from the main text due to lack of space.

## 1 Moments derivation

Recall that the product of the cavity distribution with the exact likelihood term is given by:

$$\begin{aligned} \hat{q}(f_i) &\triangleq \hat{Z}_i \mathcal{N}(\hat{\mu}_i, \hat{\sigma}_i^2) \\ &\simeq q_{-i}(f_i) \sum_{z_i \in \{0,1\}} p(\mathbf{y}_i|z_i)p(z_i|f_i) \end{aligned}$$

which, by making of the definitions of the different probabilities, can be manipulated to give:

$$\hat{q}(f_i) = b_i \mathcal{N}(f_i|\mu_{-i}, \sigma_{-i}^2) + (a_i - b_i) \Phi(f_i) \mathcal{N}(f_i|\mu_{-i}, \sigma_{-i}^2) \quad (1)$$

whose moments we wish to compute for moment matching.

In order to make the notation simpler and the derivation easier to follow, we will derive the moments using a “generic” distribution  $q(x)$

$$q(x) = \frac{1}{Z} \left[ b \mathcal{N}(x|\mu, \sigma^2) + (a + b) \Phi(x) \mathcal{N}(x|\mu, \sigma^2) \right] \quad (2)$$

The normalization constant  $Z$  is given by:

$$\begin{aligned} Z &= \int_{-\infty}^{+\infty} b \mathcal{N}(x|\mu, \sigma^2) + (a - b) \Phi(x) \mathcal{N}(x|\mu, \sigma^2) dx \\ &= b + (a - b) \underbrace{\int_{-\infty}^{+\infty} \Phi(x) \mathcal{N}(x|\mu, \sigma^2) dx}_{=\Phi(\eta)} \\ &= b + (a - b) \Phi(\eta) \end{aligned} \quad (3)$$

where

$$\eta = \frac{\mu}{\sqrt{1 + \sigma^2}}$$

Differentiating both sides with respect to  $\mu$  gives

$$\begin{aligned} \frac{\partial Z}{\partial \mu} &= \frac{\partial [b + (a - b)\Phi(\eta)]}{\partial \mu} \\ &\Leftrightarrow b \int \frac{x - \mu}{\sigma^2} \mathcal{N}(x|\mu, \sigma^2) dx + (a - b) \int \frac{x - \mu}{\sigma^2} \Phi(x) \mathcal{N}(x|\mu, \sigma^2) dx = \frac{(a - b)\mathcal{N}(\eta)}{\sqrt{1 + \sigma^2}} \\ &\Leftrightarrow \frac{b}{\sigma^2} \int x \mathcal{N}(x|\mu, \sigma^2) dx - \frac{b\mu}{\sigma^2} \int \mathcal{N}(x|\mu, \sigma^2) dx \\ &\quad + \frac{(a - b)}{\sigma^2} \int x \Phi(x) \mathcal{N}(x|\mu, \sigma^2) dx - \frac{(a - b)\mu}{\sigma^2} \int \Phi(x) \mathcal{N}(x|\mu, \sigma^2) dx = \frac{(a - b)\mathcal{N}(\eta)}{\sqrt{1 + \sigma^2}} \\ &\Leftrightarrow \int x \left[ b \mathcal{N}(x|\mu, \sigma^2) + (a - b) \Phi(x) \mathcal{N}(x|\mu, \sigma^2) \right] dx \\ &\quad - \underbrace{\mu \int b \mathcal{N}(x|\mu, \sigma^2) + (a - b) \Phi(x) \mathcal{N}(x|\mu, \sigma^2) dx}_{=Z} = \frac{(a - b)\sigma^2 \mathcal{N}(\eta)}{\sqrt{1 + \sigma^2}} \end{aligned}$$

where we made use of the fact that  $\partial \Phi(\eta)/\partial \mu = \mathcal{N}(\eta) \partial \eta / \partial \mu$ .

We recognise the first term on the left hand side to be  $Z$  times the first moment of  $q$  which we are seeking. Dividing through by  $Z$  gives

$$\begin{aligned} \mathbb{E}_q[x] &= \mu + \frac{(a - b)\sigma^2 \mathcal{N}(\eta)}{Z \sqrt{1 + \sigma^2}} \\ &= \mu + \frac{(a - b)\sigma^2 \mathcal{N}(\eta)}{\left[ b + (a - b)\Phi(\eta) \right] \sqrt{1 + \sigma^2}} \end{aligned} \tag{4}$$

Similarly, the second moment can be obtained by differentiating both sides of eq. 3 twice:

$$\begin{aligned} \frac{\partial^2 Z}{\partial^2 \mu} &= \frac{\partial^2 [b + (a - b)\Phi(\eta)]}{\partial^2 \mu} \\ &\Leftrightarrow b \int \left[ \frac{x^2}{\sigma^4} - \frac{2\mu x}{\sigma^4} + \frac{\mu^2}{\sigma^4} - \frac{1}{\sigma^2} \right] \mathcal{N}(x|\mu, \sigma^2) dx \\ &\quad + (a - b) \int \left[ \frac{x^2}{\sigma^4} - \frac{2\mu x}{\sigma^4} + \frac{\mu^2}{\sigma^4} - \frac{1}{\sigma^2} \right] \Phi(x) \mathcal{N}(x|\mu, \sigma^2) dx = -\frac{(a - b)\eta \mathcal{N}(\eta)}{1 + \sigma^2} \end{aligned}$$

Multiplying through  $\sigma^4$  and re-arranging gives

$$\begin{aligned}
&\Leftrightarrow b \int \left[ x^2 - 2\mu x + \mu^2 - \sigma^2 \right] \mathcal{N}(x|\mu, \sigma^2) dx \\
&\quad + (a-b) \int \left[ x^2 - 2\mu x + \mu^2 - \sigma^2 \right] \Phi(x) \mathcal{N}(x|\mu, \sigma^2) dx = -\frac{(a-b)\sigma^4 \eta \mathcal{N}(\eta)}{1+\sigma^2} \\
&\Leftrightarrow b \int x^2 \mathcal{N}(x|\mu, \sigma^2) dx - 2\mu b \int x \mathcal{N}(x|\mu, \sigma^2) dx \\
&\quad + \mu^2 b \int \mathcal{N}(x|\mu, \sigma^2) dx - \sigma^2 b \int \mathcal{N}(x|\mu, \sigma^2) dx \\
&\quad + (a-b) \int x^2 \Phi(x) \mathcal{N}(x|\mu, \sigma^2) dx - 2\mu(a-b) \int x \Phi(x) \mathcal{N}(x|\mu, \sigma^2) dx \\
&\quad + \mu^2(a-b) \int \Phi(x) \mathcal{N}(x|\mu, \sigma^2) dx - \sigma^2(a-b) \int \Phi(x) \mathcal{N}(x|\mu, \sigma^2) dx = -\frac{(a-b)\sigma^4 \eta \mathcal{N}(\eta)}{1+\sigma^2} \\
&\Leftrightarrow \int x^2 \left[ b \mathcal{N}(x|\mu, \sigma^2) + (a-b) \Phi(x) \mathcal{N}(x|\mu, \sigma^2) \right] dx \\
&\quad - 2\mu \int x \left[ b \mathcal{N}(x|\mu, \sigma^2) + (a-b) \Phi(x) \mathcal{N}(x|\mu, \sigma^2) \right] dx \\
&\quad + \mu^2 \underbrace{\int b \mathcal{N}(x|\mu, \sigma^2) + (a-b) \Phi(x) \mathcal{N}(x|\mu, \sigma^2) dx}_{=Z} \\
&\quad - \sigma^2 \underbrace{\int b \mathcal{N}(x|\mu, \sigma^2) + (a-b) \Phi(x) \mathcal{N}(x|\mu, \sigma^2) dx}_{=Z} = -\frac{(a-b)\sigma^4 \eta \mathcal{N}(\eta)}{1+\sigma^2} \\
&\Leftrightarrow Z \mathbb{E}_q[x^2] - 2\mu Z \mathbb{E}_q[x] + \mu^2 Z - \sigma^2 Z = -\frac{(a-b)\sigma^4 \eta \mathcal{N}(\eta)}{1+\sigma^2}
\end{aligned}$$

Dividing through  $Z$  gives

$$\begin{aligned}
&\Leftrightarrow \mathbb{E}_q[x^2] - 2\mu \mathbb{E}_q[x] + \mu^2 - \sigma^2 = -\frac{(a-b)\sigma^4 \eta \mathcal{N}(\eta)}{Z(1+\sigma^2)} \\
&\Leftrightarrow \mathbb{E}_q[x^2] = 2\mu \mathbb{E}_q[x] - \mu^2 + \sigma^2 - \frac{(a-b)\sigma^4 \eta \mathcal{N}(\eta)}{Z(1+\sigma^2)} \tag{5}
\end{aligned}$$

The second moment is then given by

$$\begin{aligned}
\mathbb{E}_q[(x - \mathbb{E}_q[x])^2] &= \mathbb{E}_q[x^2] - \mathbb{E}_q[x]^2 \\
&= 2\mu\mathbb{E}_q[x] - \mu^2 + \sigma^2 - \frac{(a-b)\sigma^4\eta\mathcal{N}(\eta)}{Z(1+\sigma^2)} - \left(\mu + \frac{(a-b)\sigma^2\mathcal{N}(\eta)}{Z\sqrt{1+\sigma^2}}\right)^2 \\
&= 2\mu\left(\mu + \frac{(a-b)\sigma^2\mathcal{N}(\eta)}{Z\sqrt{1+\sigma^2}}\right) \\
&\quad - \mu^2 + \sigma^2 - \frac{(a-b)\sigma^4\eta\mathcal{N}(\eta)}{Z(1+\sigma^2)} - \left(\mu + \frac{(a-b)\sigma^2\mathcal{N}(\eta)}{Z\sqrt{1+\sigma^2}}\right)^2 \\
&= 2\mu^2 + \frac{2\mu(a-b)\sigma^2\mathcal{N}(\eta)}{Z\sqrt{1+\sigma^2}} \\
&\quad - \mu^2 + \sigma^2 - \frac{(a-b)\sigma^4\eta\mathcal{N}(\eta)}{Z(1+\sigma^2)} - \left(\mu + \frac{(a-b)\sigma^2\mathcal{N}(\eta)}{Z\sqrt{1+\sigma^2}}\right)^2 \\
&= \mu^2 + \frac{2\mu(a-b)\sigma^2\mathcal{N}(\eta)}{Z\sqrt{1+\sigma^2}} + \sigma^2 - \frac{(a-b)\sigma^4\eta\mathcal{N}(\eta)}{Z(1+\sigma^2)} - \left(\mu + \frac{(a-b)\sigma^2\mathcal{N}(\eta)}{Z\sqrt{1+\sigma^2}}\right)^2
\end{aligned}$$

Manipulating this expression further, we arrive at

$$\mathbb{E}_q[(x - \mathbb{E}_q[x])^2] = \sigma^2 - \frac{\sigma^4}{1+\sigma^2} \left( \frac{\eta\mathcal{N}(\eta)(a-b)}{b+(a-b)\Phi(\eta)} + \frac{\mathcal{N}(\eta)^2(a-b)^2}{(b+(a-b)\Phi(\eta))^2} \right) \quad (6)$$

By making use of the moments derived above, the moments of the distribution in eq. 1 are then given by

$$\begin{aligned}
\hat{Z}_i &= b_i + (a_i - b_i)\Phi(\eta_i) \\
\hat{\mu}_i &= \mu_{-i} + \frac{(a_i - b_i)\sigma_{-i}^2\mathcal{N}(\eta_i)}{\left[b_i + (a_i - b_i)\Phi(\eta_i)\right]\sqrt{1 - \sigma_{-i}^2}} \\
\hat{\sigma}_i &= \sigma_{-i}^2 - \frac{\sigma_{-i}^4}{1 + \sigma_{-i}^2} \left( \frac{\eta_i\mathcal{N}(\eta_i)(a_i - b_i)}{b_i + (a_i - b_i)\Phi(\eta_i)} + \frac{\mathcal{N}(\eta_i)^2(a_i - b_i)^2}{(b_i + (a_i - b_i)\Phi(\eta_i))^2} \right)
\end{aligned}$$

where

$$\eta_i = \frac{\mu_{-i}}{\sqrt{1 + \sigma_{-i}^2}}.$$
